# Supplementary material for: Molecular characterization of a Minus-C odorant-binding protein from Cyrtotrachelus buqueti (Coleoptera: Curculionidae)
Source: Front Physiol. 2025 Apr 25;16:1586738. doi: 10.3389/fphys.2025.1586738 (PMC12061717; doi:10.3389/fphys.2025.1586738)
Supplement: Supplementary file 2 [file Table2.docx]

**Table S2.** GenBank accession numbers of OBP sequences from other species of Coleoptera.

| **Species** | **Protein name** | **GenBank accession No.** |
| --- | --- | --- |
| *Rhyzopertha dominica* | RdomOBP1 | AIX97124.1 |
| RdomOBP2 | AIX97125.1 |
| RdomOBP3 | AIX97126.1 |
| RdomOBP4 | AIX97127.1 |
| RdomOBP5 | AIX97128.1 |
| RdomOBP6 | AIX97129.1 |
| RdomOBP7 | AIX97130.1 |
| RdomOBP9 | AIX97132.1 |
| RdomOBP10 | AIX97133.1 |
| RdomOBP11 | AIX97134.1 |
| *Sitophilus zeamais* | SzeaOBP1 | QCT83255.1 |
| SzeaOBP4 | QCT83258.1 |
| SzeaOBP7 | QCT83261.1 |
| SzeaOBP9 | QCT83263.1 |
| SzeaOBP11 | QCT83265.1 |
| SzeaOBP12 | QCT83266.1 |
| SzeaOBP14 | QCT83268.1 |
| SzeaOBP15 | QCT83269.1 |
| *Rhynchophorus ferrugineus* | RferOBP1 | ANE37545.1 |
| RferOBP2 | ANE37546.1 |
| RferOBP3 | ANE37547.1 |
| RferOBP4 | ANE37548.1 |
| RferOBP5 | ANE37549.1 |
| RferOBP6 | ANE37550.1 |
| RferOBP7 | ANE37551.1 |
| RferOBP8 | ANE37552.1 |
| RferOBP9 | ANE37553.1 |
| RferOBP10 | ANE37554.1 |
| RferOBP11 | ANE37555.1 |
| RferOBP28 | ATU47278.1 |
| *Pachyrhinus yasumatsui* | PyasOBP1 | WJJ63261.1 |
| PyasOBP2 | UUK33715.1 |
| PyasOBP5 | UUK33716.1 |
| PyasOBP7 | WJJ63265.1 |
| PyasOBP8 | WJJ63266.1 |
| PyasOBP9 | WJJ63267.1 |
| PyasOBP10 | WJJ63268.1 |
| PyasOBP14 | WJJ63272.1 |
| PyasOBP15 | WJJ63273.1 |
| PyasOBP17 | WJJ63275.1 |
| PyasOBP18 | WJJ63276.1 |
| PyasOBP19 | WJJ63277.1 |
| PyasOBP21 | WJJ63279.1 |
| PyasOBP22 | WJJ63280.1 |
| PyasOBP27 | WJJ63285.1 |
| PyasOBP28 | WJJ63286.1 |
| *Cylas formicarius* | CforOBP | QFO46787.1 |
| CforOBP8 | QBI90150.1 |
| CforOBP30 | UNA06114.1 |
| CforOBP31 | UNA06115.1 |
| CforOBP33 | UNA06117.1 |
| CforOBP36 | UZC53364.1 |
